# Supplementary material for: Perspectives of Registered Dietitian Nutritionists on Adoption of Telehealth for Nutrition Care during the COVID-19 Pandemic
Source: Healthcare (Basel). 2021 Feb 23;9(2):235. doi: 10.3390/healthcare9020235 (PMC7926532; doi:10.3390/healthcare9020235)
Supplement: Supplementary file 1 [file healthcare-09-00235-s001.pdf]

Figure S1. Nutrition Care and Telehealth Related to the COVID-19 Pandemic and Beyond Survey.

Thank you for taking the time to complete this survey – the information provided will be extremely valuable in advancing nutrition care.

Objectives

- Determine how providers were using telehealth prior to the COVID-19 pandemic (prior to February 1, 2020) and how their telehealth practices may have evolved and changed over time this year
- Identify positive/negative impacts and future implications for using telehealth in nutrition care

For this questionnaire, Telehealth refers to team consultation and conferencing, delivery of clinical services, education, patient monitoring and follow-up. It does not refer to patient scheduling or account management processes.

1. What is your current clinical designation?
  - a. \_\_\_\_\_ Registered Dietitian Nutritionist
  - b. \_\_\_\_\_ Registered Nurse
  - c. \_\_\_\_\_ Physician
  - d. \_\_\_\_\_ Administrator
  - e. \_\_\_\_\_ Other (please specify)

2. Has your institution treated any COVID-19 patients since February 1, 2020?

\_\_\_\_\_ YES  
\_\_\_\_\_ NO

If yes, approximately how many cases of COVID-19 has/have your nutrition department(s) treated between February 1, 2020 and today?

\_\_\_\_\_

If no, please continue to work through the questionnaire. All responses are valuable.

**TELEHEALTH AND YOUR INSTITUTION (Health system, organization, hospital or facility, including, acute care, rehabilitation, academic medical center, etc.)**

3. What is your experience with telehealth prior to and post COVID-19 pandemic (February 1, 2020)? Please put an X in the appropriate box.

|                                                                                                     | Yes | No | Don't Know |
|-----------------------------------------------------------------------------------------------------|-----|----|------------|
| Prior to the pandemic, did your <b>institution</b> provide access to telehealth?                    |     |    |            |
| Post pandemic, does your <b>institution</b> now provide access to telehealth?                       |     |    |            |
| Prior to the pandemic, had <b>nutrition care</b> been delivered to patients via telehealth?         |     |    |            |
| Post pandemic, is there now access to <b>nutrition care</b> for patients via telehealth?            |     |    |            |
| Prior to the pandemic, had you <b>personally</b> used a form of telehealth to deliver patient care? |     |    |            |
| Post pandemic, have you <b>personally</b> used a form of telehealth to deliver patient care?        |     |    |            |

4. If you responded with any "yes" in question 2, what forms of telehealth have your institution and/or you used for provision of clinical services? Place an X in all that apply.

| Telehealth Service        | Institution Has Used |               | You Have Used   |               |
|---------------------------|----------------------|---------------|-----------------|---------------|
|                           | Prior to COVID-19    | Post COVID-19 | Prior to COVID- | Post COVID-19 |
| Live video conferencing   |                      |               |                 |               |
| Phone calls               |                      |               |                 |               |
| Web-based portals         |                      |               |                 |               |
| Remote patient monitoring |                      |               |                 |               |
| Other (specify)           |                      |               |                 |               |
| Not applicable            |                      |               |                 |               |

5. Have your telehealth platforms (technologies) changed over time since the start of the pandemic (February 1, 2020)?

\_\_\_\_\_ No

\_\_\_\_\_ Yes

Prior Technology: \_\_\_\_\_ (e.g. FaceTime)

Current Technology: \_\_\_\_\_ (e.g. Zoom)

6. Is telehealth allowing you to perform your job duties effectively? Why or why not?

7. What were patients/families' reactions to telehealth prior to the COVID-19 pandemic and after?

Please put an X in the appropriate box to indicate your answer

|                      | They like it and use it | They are indifferent towards it | They do not like it or want to use it | Don't know |
|----------------------|-------------------------|---------------------------------|---------------------------------------|------------|
| 1. Prior to COVID-19 |                         |                                 |                                       |            |
| 2. After COVID-19    |                         |                                 |                                       |            |

8. Do you anticipate that your institution might permanently adopt the changes it has implemented in telehealth after the pandemic has resolved?

\_\_\_\_\_ Yes

\_\_\_\_\_ No

\_\_\_\_\_ No changes implemented

\_\_\_\_\_ Don't know

9. Why or why not might your institution permanently adopt the changes it has implemented in telehealth?

**TELEHEALTH AND NUTRITION CARE**

10. What types of nutrition care have your team and/or you been able to provide via telehealth?  
Check all that apply.

| Telehealth Service                       | Team Provides via Telehealth | You Provide via Telehealth |
|------------------------------------------|------------------------------|----------------------------|
| Nutrition screening                      |                              |                            |
| Nutrition assessment                     |                              |                            |
| Nutrition care plan development          |                              |                            |
| Nutrition counseling                     |                              |                            |
| Nutrition education                      |                              |                            |
| Nutrition discharge planning             |                              |                            |
| Nutrition supplementation recommendation |                              |                            |
| Other (specify)                          |                              |                            |
| Not applicable                           |                              |                            |

11. Has telehealth impacted the overall nutrition care provided to COVID-19 patients and non-COVID-19 patients in your institution?

\_\_\_\_\_ Yes

\_\_\_\_\_ No

12. If yes, how?

13. What are some positive impacts nutrition care via telehealth is having for you, your colleagues and/or patients/families?

14. What are the most important challenges/negative impacts that you have frequently encountered in providing quality nutrition care to your patients via telehealth?

15. What workarounds or alternative care approaches have you and/or your team implemented in response to these challenges?

16. What improvements could be made to increase the effectiveness of nutrition care given via telehealth?

17. **GENERAL INFORMATION**

18. Please describe your healthcare institution.

| Characteristic                          | Your Response |
|-----------------------------------------|---------------|
| Academic teaching institution (yes/no)  |               |
| Size/Number of patient beds             |               |
| Specialty institution (if yes, specify) |               |
| Urban or rural                          |               |
| Part of health system (yes/no)          |               |

19. We would appreciate any other information or observations you may have about the response of institutional nutrition departments to the use of telehealth during the COVID-19 pandemic. If you would be willing to have a short follow-up conversation with one of our team members, please check yes below and include your name, email, and phone number. You may also add further comments below.

\_\_\_\_\_ No Thanks

\_\_\_\_\_ Yes

|               |       |
|---------------|-------|
| Name          | _____ |
| Institution   | _____ |
| Phone Number  | _____ |
| Email Address | _____ |

Thank you!
